# Supplementary material for: An Integrated TCGA Pan-Cancer Clinical Data Resource to Drive High-Quality Survival Outcome Analytics
Source: PubMed Central journal article supplement — Cell. Author manuscript; Available in PMC 2019 Apr 5. (PMC6066282; doi:10.1016/j.cell.2018.02.052), 2018-04-05
Supplement: NIHMS978596-supplement-2.pdf [file NIHMS978596-supplement-2.pdf]

**Table S2.** Cases reported as dead with tumor, with a reported NTE vs without a reported NTE. Related to Figure 1 and Table 2.

| Type               | Dead with Tumor with Reported NTE |                      |                      | Dead With Tumor w/o Reported NTE |                     |                      | Wilcoxon p_value    |
|--------------------|-----------------------------------|----------------------|----------------------|----------------------------------|---------------------|----------------------|---------------------|
|                    | # Deaths                          | Mean Time to NTE     | Median Time to NTE   | # Deaths                         | Mean Time to Death  | Median Time to Death |                     |
| ACC                | 25                                | 220.3                | 153                  | 5                                | 867.6               | 541                  | 0.075               |
| <b><i>BLCA</i></b> | <b><i>91</i></b>                  | <b><i>423.5</i></b>  | <b><i>310</i></b>    | <b><i>33</i></b>                 | <b><i>278.9</i></b> | <b><i>220</i></b>    | <b><i>0.052</i></b> |
| BRCA               | 51                                | 913.7                | 682                  | 32                               | 1248                | 944                  | 0.184               |
| CESC               | 30                                | 490.3                | 328.5                | 23                               | 475.7               | 471                  | 0.34                |
| CHOL               | 16                                | 173.4                | 206.5                | 2                                | 365.5               | 365.5                | 0.392               |
| <b><i>COAD</i></b> | <b><i>31</i></b>                  | <b><i>427.3</i></b>  | <b><i>304</i></b>    | <b><i>33</i></b>                 | <b><i>230.9</i></b> | <b><i>153</i></b>    | <b><i>0.009</i></b> |
| <b><i>ESCA</i></b> | <b><i>35</i></b>                  | <b><i>364.6</i></b>  | <b><i>270</i></b>    | <b><i>16</i></b>                 | <b><i>371.4</i></b> | <b><i>239</i></b>    | <b><i>0.776</i></b> |
| <b><i>GBM</i></b>  | <b><i>320</i></b>                 | <b><i>309.3</i></b>  | <b><i>201</i></b>    | <b><i>125</i></b>                | <b><i>264</i></b>   | <b><i>142</i></b>    | <b><i>0.018</i></b> |
| HNSC               | 77                                | 341                  | 244                  | 53                               | 660.7               | 361                  | <b><i>0.036</i></b> |
| KICH               | 7                                 | 273.7                | 175                  | 2                                | 1097                | 1097                 | 1                   |
| KIRC               | 74                                | 365.5                | 245                  | 35                               | 722.5               | 459                  | <b><i>0.004</i></b> |
| KIRP               | 22                                | 342.2                | 163                  | 5                                | 515.4               | 336                  | 0.186               |
| <b><i>LGG</i></b>  | <b><i>86</i></b>                  | <b><i>738.8</i></b>  | <b><i>425</i></b>    | <b><i>27</i></b>                 | <b><i>497.9</i></b> | <b><i>316</i></b>    | <b><i>0.085</i></b> |
| LIHC               | 74                                | 379.7                | 256                  | 6                                | 443.8               | 404.5                | 0.668               |
| <b><i>LUAD</i></b> | <b><i>90</i></b>                  | <b><i>483.9</i></b>  | <b><i>408.5</i></b>  | <b><i>23</i></b>                 | <b><i>490.7</i></b> | <b><i>385</i></b>    | <b><i>0.977</i></b> |
| LUSC               | 75                                | 550.6                | 390                  | 15                               | 608.5               | 543                  | 0.502               |
| MESO               | 27                                | 300.5                | 238                  | 14                               | 316.6               | 297                  | 1                   |
| <b><i>OV</i></b>   | <b><i>250</i></b>                 | <b><i>460.2</i></b>  | <b><i>400.5</i></b>  | <b><i>51</i></b>                 | <b><i>545.9</i></b> | <b><i>346</i></b>    | <b><i>0.244</i></b> |
| PAAD               | 51                                | 326.7                | 228                  | 26                               | 376.5               | 379.5                | 0.071               |
| <b><i>PCPG</i></b> | <b><i>1</i></b>                   | <b><i>648</i></b>    | <b><i>648</i></b>    | <b><i>3</i></b>                  | <b><i>386.3</i></b> | <b><i>309</i></b>    | <b><i>1</i></b>     |
| PRAD               | 3                                 | 841.7                | 626                  | 2                                | 737.5               | 737.5                | 0.8                 |
| READ               | 8                                 | 384.4                | 246                  | 7                                | 566.9               | 610                  | 0.452               |
| SARC               | 68                                | 305.9                | 204                  | 13                               | 555.6               | 384                  | 0.322               |
| SKCM               | 156                               | 1222.1               | 565.5                | 33                               | 1592                | 1078                 | <b><i>0.003</i></b> |
| <b><i>STAD</i></b> | <b><i>71</i></b>                  | <b><i>358.7</i></b>  | <b><i>282</i></b>    | <b><i>28</i></b>                 | <b><i>329.4</i></b> | <b><i>257</i></b>    | <b><i>0.43</i></b>  |
| <b><i>TGCT</i></b> | <b><i>2</i></b>                   | <b><i>187</i></b>    | <b><i>187</i></b>    | <b><i>1</i></b>                  | <b><i>17</i></b>    | <b><i>17</i></b>     | <b><i>0.667</i></b> |
| <b><i>THCA</i></b> | <b><i>2</i></b>                   | <b><i>1320.5</i></b> | <b><i>1320.5</i></b> | <b><i>5</i></b>                  | <b><i>670.8</i></b> | <b><i>533</i></b>    | <b><i>0.381</i></b> |
| <b><i>THYM</i></b> | <b><i>3</i></b>                   | <b><i>1102</i></b>   | <b><i>1224</i></b>   | <b><i>1</i></b>                  | <b><i>853</i></b>   | <b><i>853</i></b>    | <b><i>1</i></b>     |
| <b><i>UCEC</i></b> | <b><i>45</i></b>                  | <b><i>557.3</i></b>  | <b><i>424</i></b>    | <b><i>15</i></b>                 | <b><i>483.9</i></b> | <b><i>346</i></b>    | <b><i>0.484</i></b> |
| <b><i>UCS</i></b>  | <b><i>25</i></b>                  | <b><i>436.4</i></b>  | <b><i>274</i></b>    | <b><i>6</i></b>                  | <b><i>225</i></b>   | <b><i>185</i></b>    | <b><i>0.355</i></b> |
| UVM                | 10                                | 298.2                | 290.5                | 8                                | 788.6               | 859.5                | 0.173               |
| TCGA_Pan           | 1830                              | 492.7                | 306.5                | 648                              | 540.3               | 322.5                | 0.949               |

Note: The p-values were calculated from the Wilcoxon rank-sum tests of difference between median time to NTE and median time to death. Of the 33 cancers, except for LAML and DLBC, 31 had data for this analysis. Rows with bold face and italic texts are 14 cancers with a shorter median event time for those not having an NTE than those with an NTE. The others 17 cancers had a longer median event time for cases not having an NTE. Cancers showing a significant difference between the two median times had p-values shown in red. The last row of TCGA\_PAN shows the data from all 31 cancer types.
