# Supplementary material for: An Integrated TCGA Pan-Cancer Clinical Data Resource to Drive High-Quality Survival Outcome Analytics
Source: PubMed Central journal article supplement — Cell. Author manuscript; Available in PMC 2019 Apr 5. (PMC6066282; doi:10.1016/j.cell.2018.02.052), 2018-04-05
Supplement: NIHMS978596-supplement-3.pdf [file NIHMS978596-supplement-3.pdf]

**Table S3.** Cause of death collected in 6 of the 33 cancer types. Related to Figure 1 and Table 3.

| Tumor | Cause of death                                    | Censored | Events | N/A |
|-------|---------------------------------------------------|----------|--------|-----|
| CESC  | Cervical Cancer                                   | 0        | 49     | 0   |
|       | N/A                                               | 249      | 5      | 4   |
| PAAD  | Pancreatic Cancer                                 | 0        | 66     | 0   |
|       | Other: malignancy, non-malignant disease, specify | 8        | 0      | 0   |
|       | Surgical Complications                            | 3        | 0      | 0   |
|       | N/A                                               | 88       | 13     | 7   |
| PRAD  | Prostate Cancer                                   | 0        | 3      | 0   |
|       | Other, non-malignant disease                      | 1        | 0      | 0   |
|       | N/A                                               | 492      | 2      | 2   |
| STAD  | Stomach Cancer                                    | 0        | 45     | 0   |
|       | Other, non-malignant disease                      | 7        | 0      | 0   |
|       | N/A                                               | 306      | 58     | 27  |
| TGCT  | Testicular Germ Cell Tumor (TGCT)                 | 0        | 3      | 0   |
|       | N/A                                               | 131      | 0      | 0   |
| UVM   | Metastatic Uveal Melanoma                         | 0        | 18     | 0   |
|       | Other, specify                                    | 1        | 0      | 0   |
|       | N/A                                               | 54       | 7      | 0   |

N/A, Not Available / Unknown
